# Supplementary material
Source: ML conference proceedings conference paper supplement (https://aclanthology.org/2024.inlg-main.11)
Supplement: Supplementary_Attachment [file 2024.inlg-main.11.Supplementary_Attachment.pdf]

## A Human Annotation Details

In fig. 6 we provide a screenshot of a website we built for human annotation. You can see there an example of an instance to annotate as well as the questions which were shown to the annotators.

**Payment details.** Prolific only allows to set a fixed rate for the task completed by the annotator. So, we first estimated how long it takes to annotate 100 instances and to read all the instruction, and we would set the rates accordingly to get an average of 10.5€ per hour. However, in reality some annotators would be faster than anticipated, so the actual average (total payment divided by total time spent) is about 10.7€ per hour.

## B Full Automatic Evaluation Results

In table 5 we provide all the automatic evaluation results of all the models on all of the test sets for Russian. We can see that for Russian models all metrics favour the Interno model. In table 6 we provide all the automatic evaluation results of all the models on all of the test sets for English. Only for KELM-E+P we see that different metrics favour different models, however the difference for TER and BERT metrics is not significant.

As according to table 2 KELM-E+P is also balanced regarding the input graph size, we decided to also additionally provide BLEU scores by each graph size for this benchmark for both English and Russian. The graphs in fig. 7 illustrate those results. We see a well expected drop of performance for all English models with a graph size increase. However, we do not see the same drop for Russian models. This may be due to the overall poorer performance of Russian models on unseen data.

## C Graph sizes in Kelm-E+P

We provide graph sizes distribution in Kelm-E+P depending on each ratio range in table 7.

## D Error Annotation Examples

We show some of the annotated examples of generated texts in English (table 8) and Russian (tables 9 and 10). We highlight there the specific issues which led to annotation of the specific error. Note, that normally each generated text may have several problems, in the table we only highlight the one which illustrates the specific error. We also provide translations for Russian examples (except for "garbage" category).

## E Full Qualitative Analysis Results

We present all the ratios of errors and good instances across all models, benchmarks and languages in table 11. We also show a progression of a ratio of each error for each model on KELM-E+P benchmark for English (fig. 8) and Russian (fig. 9).

| Text                                                                            | Data               |                                                  |                      |
|---------------------------------------------------------------------------------|--------------------|--------------------------------------------------|----------------------|
| The Battle of Fowltown was fought in the United States in the state of Georgia. | <b>Subject</b>     | <b>Predicate</b>                                 | <b>Object</b>        |
|                                                                                 | Battle of Fowltown | located in the administrative territorial entity | Georgia (U.S. state) |
|                                                                                 | Battle of Fowltown | country                                          | United States        |

  

**No omission.**

Looking at each element of the Data in turn, does the Text express each of these elements in full (allow synonyms and aggregation)?

Yes  
 No

**No addition.**

Looking at the Text, is all of its content expressed in the Data expression? (Allow duplication of content.)

Yes  
 No

**Repetition.**

Is any content in the Text unnecessarily repeated?

Yes  
 No

**Fluency.**

Please rate the text shown in terms of fluency on a scale of 1 to 5 where 5 is the highest (best) score. Highly fluent text 'flows well' and is well connected and free from disfluencies.

1  2  3  4  5

Figure 6: A screenshot from the annotation website we built. Evaluation of a text-data pair.

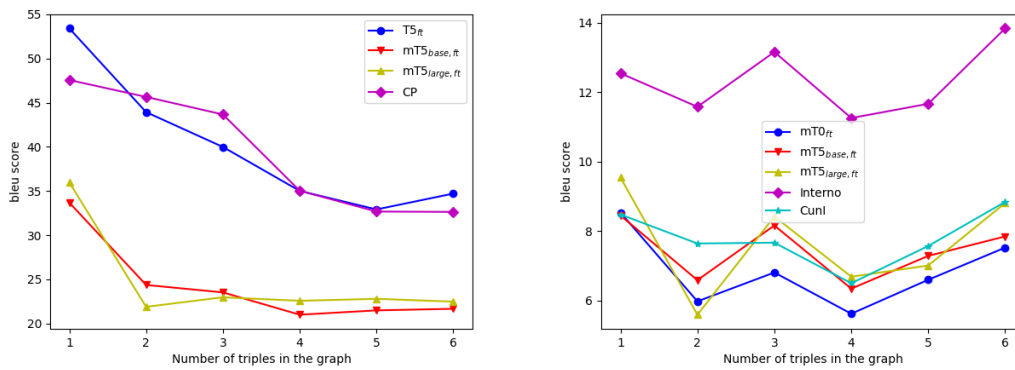

Figure 7: BLEU scores for different graph sizes in KELM-E+Pfor English (left) and Russian (right)

| Model                   | BLEU $\uparrow$ | chrF++ $\uparrow$ | TER $\downarrow$ | BERT P $\uparrow$ | BERT R $\uparrow$ | BERT F1 $\uparrow$ |
|-------------------------|-----------------|-------------------|------------------|-------------------|-------------------|--------------------|
| <b>ru-WebNLG All</b>    |                 |                   |                  |                   |                   |                    |
| mT0 <sub>ft</sub>       | 52.227          | 0.685             | 0.397            | 0.915             | 0.910             | 0.912              |
| mT5 <sub>base,ft</sub>  | 51.861          | 0.684             | 0.393            | 0.916             | 0.909             | 0.911              |
| mT5 <sub>large,ft</sub> | 51.954          | 0.686             | 0.401            | 0.914             | 0.908             | 0.910              |
| Interno                 | <b>53.668</b>   | <b>0.694</b>      | <b>0.373</b>     | <b>0.921</b>      | <b>0.913</b>      | <b>0.916</b>       |
| CunI                    | 48.503          | 0.673             | 0.439            | 0.902             | 0.897             | 0.898              |
| <b>ru-WebNLG E</b>      |                 |                   |                  |                   |                   |                    |
| mT0 <sub>ft</sub>       | 17.51           | 0.457             | 0.777            | 0.82              | 0.821             | 0.82               |
| mT5 <sub>base,ft</sub>  | 17.212          | 0.438             | 0.787            | 0.814             | 0.81              | 0.811              |
| mT5 <sub>large,ft</sub> | 15.1            | 0.439             | 0.87             | 0.792             | 0.805             | 0.798              |
| Interno                 | <b>22.427</b>   | <b>0.486</b>      | <b>0.649</b>     | <b>0.858</b>      | <b>0.851</b>      | <b>0.854</b>       |
| CunI                    | 17.016          | 0.426             | 0.765            | 0.804             | 0.805             | 0.804              |
| <b>ru-WebNLG C</b>      |                 |                   |                  |                   |                   |                    |
| mT0 <sub>ft</sub>       | 11.193          | 0.175             | 0.931            | 0.754             | 0.755             | 0.753              |
| mT5 <sub>base,ft</sub>  | 11.272          | 0.177             | 0.854            | 0.756             | 0.755             | 0.754              |
| mT5 <sub>large,ft</sub> | 11.289          | 0.176             | 0.928            | 0.746             | 0.748             | 0.745              |
| Interno                 | <b>23.019</b>   | <b>0.422</b>      | <b>0.653</b>     | <b>0.84</b>       | <b>0.819</b>      | <b>0.828</b>       |
| CunI                    | 11.658          | 0.289             | 0.814            | 0.757             | 0.758             | 0.757              |
| <b>KELM-E</b>           |                 |                   |                  |                   |                   |                    |
| mT0 <sub>ft</sub>       | 11.318          | 0.311             | 0.876            | 0.781             | <b>0.79</b>       | 0.785              |
| mT5 <sub>base,ft</sub>  | 10.121          | 0.296             | 0.943            | 0.767             | 0.781             | 0.773              |
| mT5 <sub>large,ft</sub> | 10.989          | 0.306             | 0.957            | 0.761             | 0.776             | 0.768              |
| Interno                 | <b>17.569</b>   | <b>0.355</b>      | <b>0.692</b>     | <b>0.818</b>      | <b>0.79</b>       | <b>0.803</b>       |
| CunI                    | 10.779          | 0.307             | 0.893            | 0.773             | 0.788             | 0.78               |
| <b>KELM-E+P</b>         |                 |                   |                  |                   |                   |                    |
| mT0 <sub>ft</sub>       | 6.811           | 0.284             | 1.314            | 0.73              | 0.747             | 0.738              |
| mT5 <sub>base,ft</sub>  | 7.483           | 0.284             | 1.178            | 0.734             | 0.749             | 0.741              |
| mT5 <sub>large,ft</sub> | 7.768           | 0.284             | 1.225            | 0.723             | 0.742             | 0.732              |
| Interno                 | <b>12.391</b>   | <b>0.355</b>      | <b>1.055</b>     | <b>0.78</b>       | <b>0.777</b>      | <b>0.778</b>       |
| CunI                    | 7.725           | 0.294             | 1.08             | 0.74              | 0.756             | 0.747              |

Table 5: Automatic evaluation results on Russian benchmarks

| <b>Model</b>            | <b>BLEU <math>\uparrow</math></b> | <b>chrF++ <math>\uparrow</math></b> | <b>TER <math>\downarrow</math></b> | <b>BERT P <math>\uparrow</math></b> | <b>BERT R <math>\uparrow</math></b> | <b>BERT F1 <math>\uparrow</math></b> |
|-------------------------|-----------------------------------|-------------------------------------|------------------------------------|-------------------------------------|-------------------------------------|--------------------------------------|
| <b>en-WebNLG</b>        |                                   |                                     |                                    |                                     |                                     |                                      |
| T5 <sub>ft</sub>        | 52.569                            | 0.680                               | 0.411                              | 0.958                               | 0.955                               | 0.956                                |
| mT5 <sub>base,ft</sub>  | 44.163                            | 0.627                               | 0.575                              | 0.942                               | 0.941                               | 0.941                                |
| mT5 <sub>large,ft</sub> | 44.019                            | 0.634                               | 0.558                              | 0.942                               | 0.942                               | 0.941                                |
| CP                      | <b>53.81</b>                      | <b>0.692</b>                        | <b>0.401</b>                       | <b>0.959</b>                        | <b>0.956</b>                        | <b>0.957</b>                         |
| <b>KELM-E</b>           |                                   |                                     |                                    |                                     |                                     |                                      |
| T5 <sub>ft</sub>        | <b>47.554</b>                     | <b>0.764</b>                        | <b>0.346</b>                       | <b>0.96</b>                         | <b>0.967</b>                        | <b>0.963</b>                         |
| mT5 <sub>base,ft</sub>  | 31.694                            | 0.66                                | 0.645                              | 0.938                               | 0.946                               | 0.942                                |
| mT5 <sub>large,ft</sub> | 32.086                            | 0.675                               | 0.541                              | 0.941                               | 0.947                               | 0.944                                |
| CP                      | 46.629                            | 0.755                               | 0.368                              | 0.959                               | 0.965                               | 0.962                                |
| <b>KELM-E+P</b>         |                                   |                                     |                                    |                                     |                                     |                                      |
| T5 <sub>ft</sub>        | <b>39.037</b>                     | <b>0.685</b>                        | 0.566                              | <b>0.946</b>                        | 0.955                               | 0.95                                 |
| mT5 <sub>base,ft</sub>  | 23.794                            | 0.566                               | 1.007                              | 0.913                               | 0.927                               | 0.92                                 |
| mT5 <sub>large,ft</sub> | 24.419                            | 0.581                               | 0.928                              | 0.915                               | 0.931                               | 0.923                                |
| CP                      | 38.863                            | 0.683                               | <b>0.553</b>                       | <b>0.946</b>                        | <b>0.956</b>                        | <b>0.951</b>                         |

Table 6: **Automatic evaluation results on English benchmarks**, i.e., WebNLG data (WebNLG: 2020 challenge test set), and two new created benchmarks for text generation from KELM.

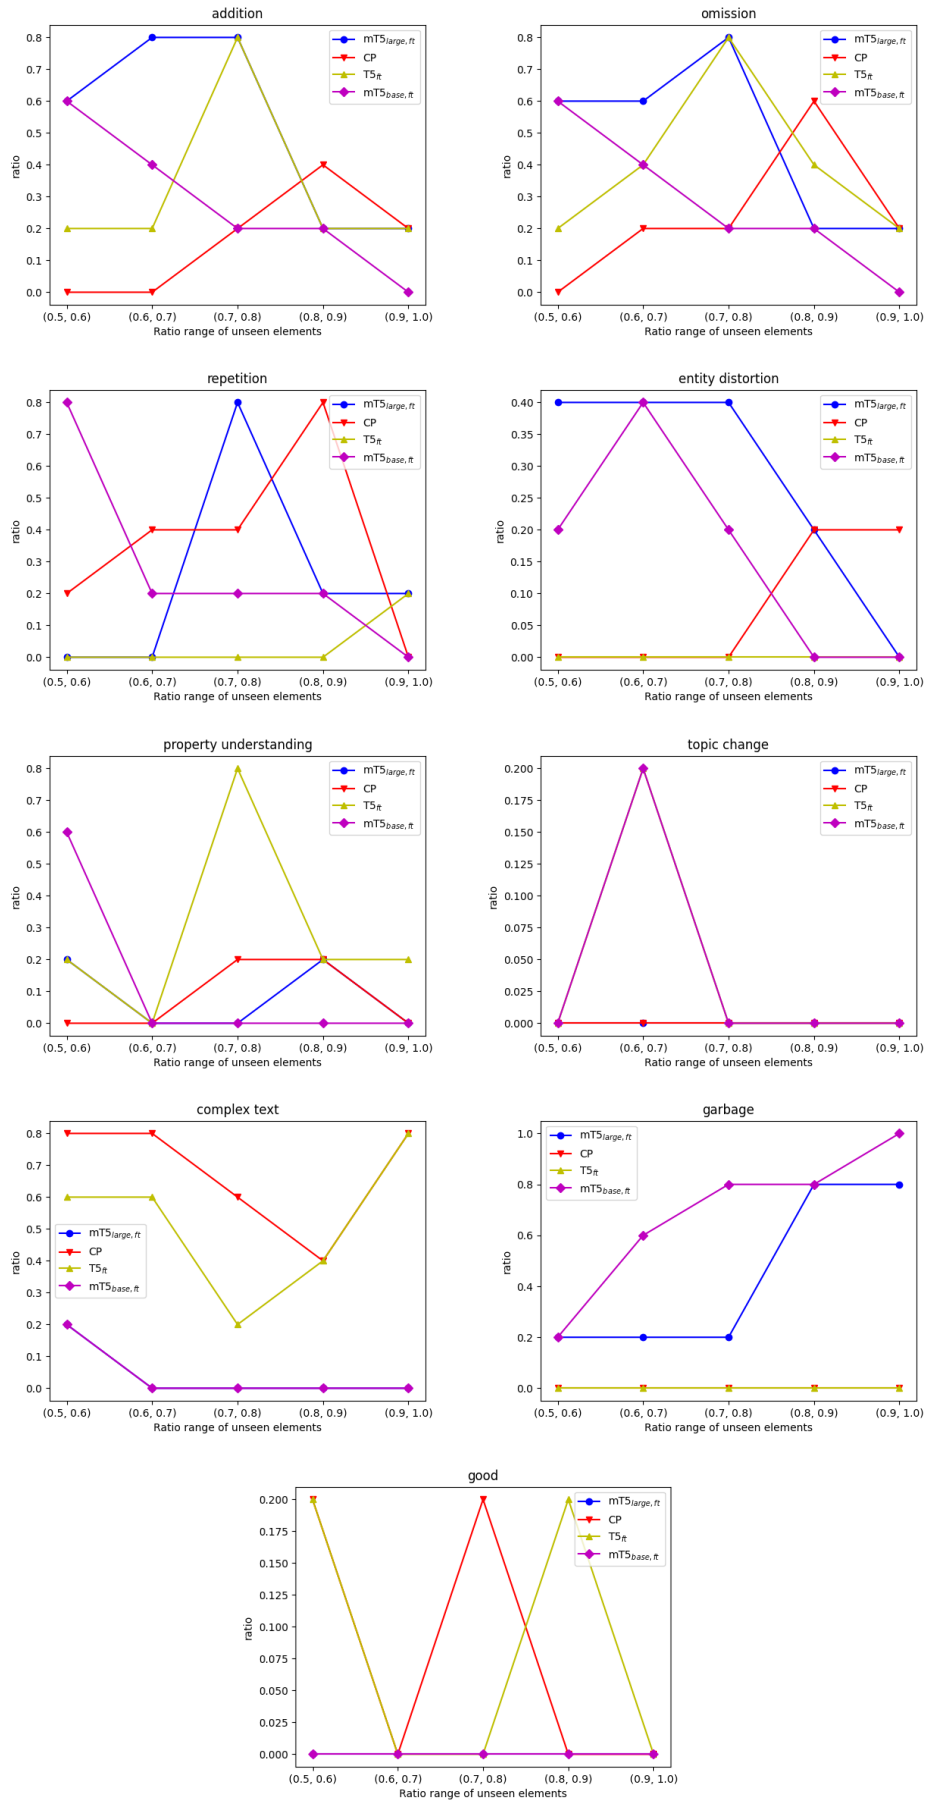

Figure 8: Each error progression on KELM-E+P dataset for English.

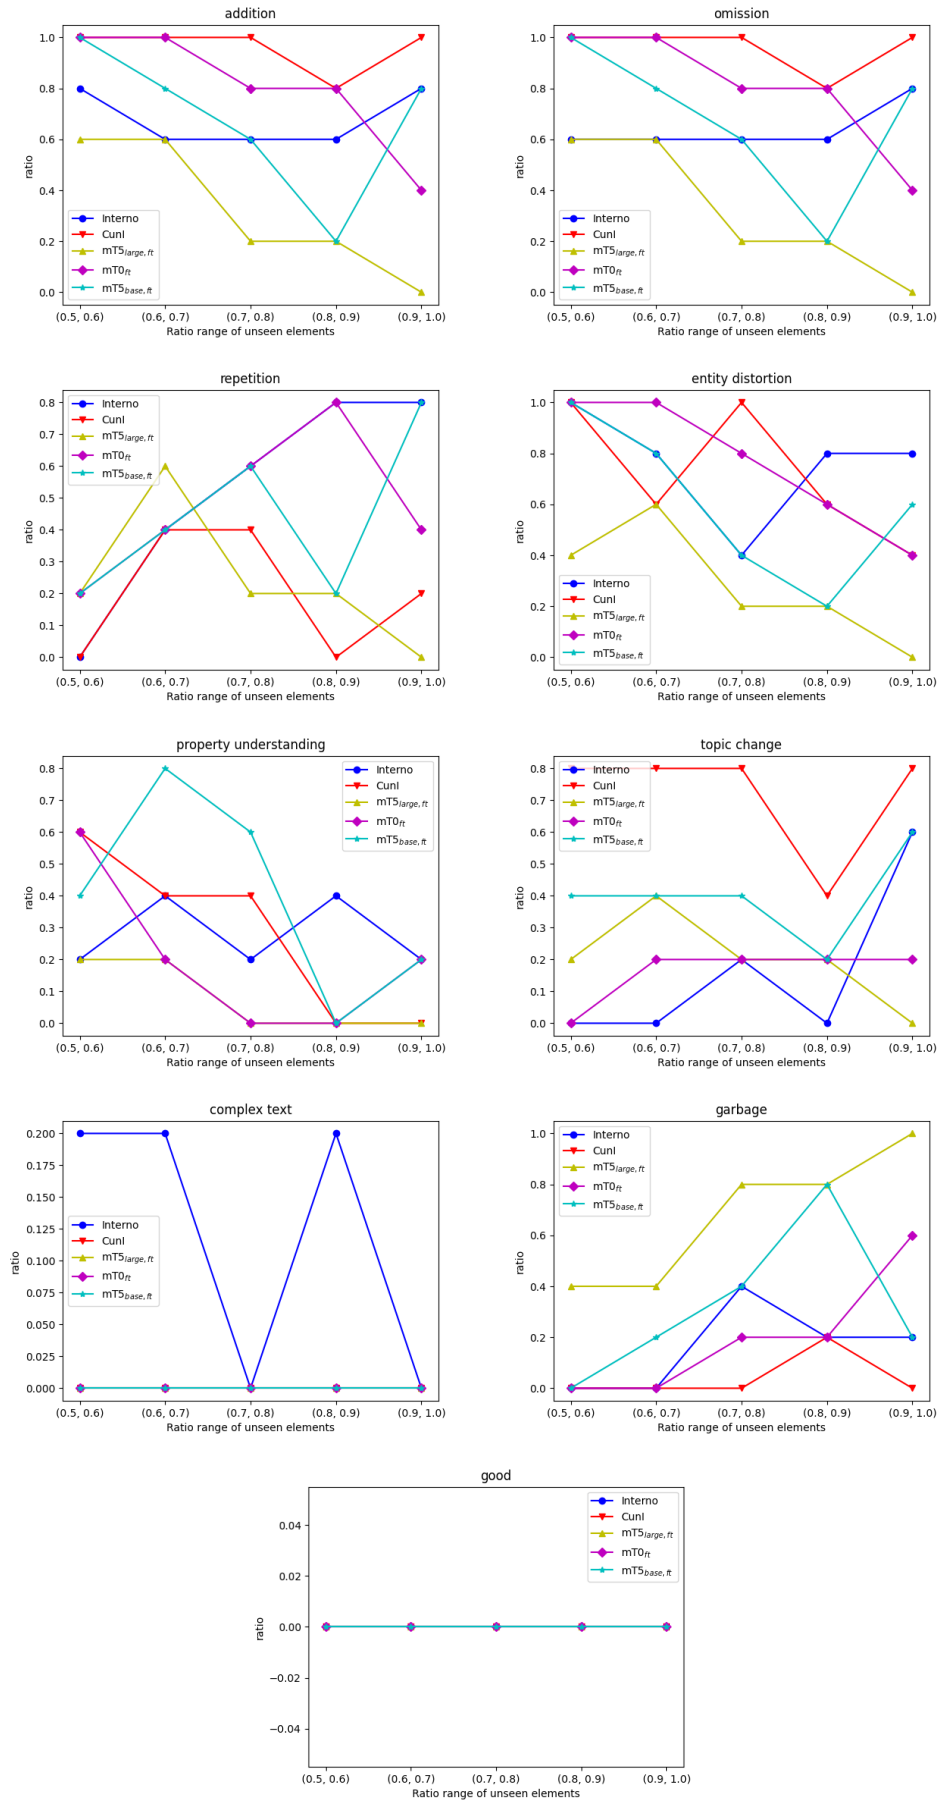

Figure 9: Each error progression on KELM-E+P dataset for Russian.

| Ratio \ Graph size | Graph size |    |    |    |     |    |
|--------------------|------------|----|----|----|-----|----|
|                    | 1          | 2  | 3  | 4  | 5   | 6  |
| (0.5, 0.6)         | 0          | 0  | 86 | 33 | 21  | 6  |
| (0.6, 0.7)         | 1          | 47 | 91 | 29 | 22  | 21 |
| (0.7, 0.8)         | 0          | 0  | 42 | 82 | 109 | 95 |
| (0.8, 0.9)         | 0          | 42 | 42 | 49 | 49  | 83 |
| (0.9, 1.0)         | 175        | 38 | 34 | 64 | 37  | 13 |

Table 7: Graph sizes distribution in each ratio range in KELM-E+P

| Error                  | Graph                                                                                                                                                                                                                                         | Generated text                                                                                                            |
|------------------------|-----------------------------------------------------------------------------------------------------------------------------------------------------------------------------------------------------------------------------------------------|---------------------------------------------------------------------------------------------------------------------------|
| Addition               | (Drenova (Prijepolje), instance of, Human settlement), (Drenova (Prijepolje), country, Serbia), (Drenova (Prijepolje), located in area, Prijepolje)                                                                                           | The city of Prijepoli in Serbia is located in the city of Prijepoli. It is a settlement located in the area of Prijepoli. |
| Omission               | (Rybakowo, Warmian-Masurian Voivodeship, instance of, village of Poland), (Rybakowo, Warmian-Masurian Voivodeship, country, Poland), (Rybakowo, Warmian-Masurian Voivodeship, located in area, Gmina Srokowo)                                 | Rybakowo, Warmian-Masurian Voivodeship is located in Gmina Srokowo, Poland.                                               |
| Repetition             | (Travis Heights, Austin, Texas, instance of, Neighbourhood), (Travis Heights, Austin, Texas, country, United States), (Travis Heights, Austin, Texas, located in area, Austin, Texas)                                                         | Travis Heights, Austin, Texas is a neighborhood in the U.S.A. and is located in Austin, Texas.                            |
| Entity distortion      | (Sandy Lloyd, occupation, Umpire (cricket)), (Sandy Lloyd, sport, Cricket), (Sandy Lloyd, occupation, Cricketer), (Sandy Lloyd, sex, Male gender), (Sandy Lloyd, given name, Sandy (given name)), (Sandy Lloyd, family name, Lloyd (surname)) | Sandy Elliot is a Male who was given the nickname 'Sandy'...                                                              |
| Property understanding | (Elliott, Illinois, instance of, Village (United States)), (Elliott, Illinois, country, United States), (Elliott, Illinois, located in area, Illinois)                                                                                        | Elliott is located in Illinois in the United States. It is part of the Village in the United States.                      |
| Topic change           | (James Baines (clipper), instance of, Ship), (James Baines (clipper), country, United Kingdom), (James Baines (clipper), location of final assembly, Boston)                                                                                  | The clipper James Baines, who was a member of the shipyard of the United Kingdom, was assembled in Boston.                |
| Complex text           | (Palaistra, Florina, instance of, Human settlement), (Palaistra, Florina, country, Greece), (Palaistra, Florina, located in area, Florina Municipality)                                                                                       | Palaistra, Florina is located in Florina Municipality, Greece and is an example of human settlement.                      |
| Garbage                | (Henuttawy (princess), sibling, Menkheperre), (Henuttawy (princess), family, Twenty-first Dynasty of Egypt), (Henuttawy (princess), sibling, Masaharta)                                                                                       | The twelid of the twelid...           |
| Good                   | (Brian Mallette, weight, +84 kilogram)                                                                                                                                                                                                        | Brian Mallette's weight is +84 kilogram.                                                                                  |

Table 8: Error annotation examples for English



| Error             | Graph                                                                                                                                                                                                                                        | Generated text                                                                                                                                                                                                                                                                                                                                                                                                                                                                     |
|-------------------|----------------------------------------------------------------------------------------------------------------------------------------------------------------------------------------------------------------------------------------------|------------------------------------------------------------------------------------------------------------------------------------------------------------------------------------------------------------------------------------------------------------------------------------------------------------------------------------------------------------------------------------------------------------------------------------------------------------------------------------|
| Addition          | (Leipzig-Schönefeld, instance of, Ortsteil), (Leipzig-Schönefeld, country, Germany), (Leipzig-Schönefeld, located in area, Leipzig)                                                                                                          | <p>Германский город Лейпциг-Шонефельд находится в районе Лейпцига и находится в области Лейпцига. <b>В городе есть Ортстайл.</b></p> <p><i>Translation:</i> The German city of Leipzig-Schönefeld is located in the district of Leipzig and is in the region of Leipzig. <b>The city has an Ortsteil.</b></p>                                                                                                                                                                      |
| Omission          | (Hypermarcas, industry, Pharmaceuticals), (Hypermarcas, type, S.A. (corporation)), (Hypermarcas, subsidiary, Mantecorp), (Hypermarcas, net income, 108600000), (Hypermarcas, number of employees, 10252), (Hypermarcas, product, Healthcare) | <p>Компания "Нурмаркас" фармацевтическая компания, которая имеет дочернюю компанию "Мантекорп". "Нурмаркас" имеет 10252 сотрудника и годовой доход 108600000.</p> <p><i>Translation:</i> Hypermarcas is a pharmaceutical company which has a subsidiary Mantecorp. Hypermarcas has 10252 employees and has an annual revenue of 108600000.</p>                                                                                                                                     |
| Repetition        | (Parliamentary Entitlements Act 1990, country, Australia), (Parliamentary Entitlements Act 1990, instance of, Act of the Parliament of Australia), (Parliamentary Entitlements Act 1990, applies to jurisdiction, Australia)                 | <p><b>Парламент Австралии</b> принял Парламентский акт 1990, который относится к юриспруденции в Австралии. Он был принят <b>Парламентом Австралии</b> и был опубликован в Акте <b>Парламента Австралии</b>.</p> <p><i>Translation:</i> <b>The Parliament of Australia</b> passed the Parliament Act 1990, which relates to jurisprudence in Australia. It was passed by <b>the Parliament of Australia</b> and was published in an Act of <b>the Parliament of Australia</b>.</p> |
| Entity distortion | (Bedford Aerodrome, runway surface type, Concrete)                                                                                                                                                                                           | <p>Тип поверхности взлетно-посадочной полосы в аэропорту "Берддорф" - бетон.</p> <p><i>Translation:</i> The surface type of the runway at <b>Berddorf</b> Airport is concrete.</p>                                                                                                                                                                                                                                                                                                 |

Table 9: Error annotation examples for Russian: addition, omission, repetition and entity distortion



|                            | #   | A    | O    | R    | ED   | PU   | TC   | CT   | garbage | good |
|----------------------------|-----|------|------|------|------|------|------|------|---------|------|
| Results for each model     |     |      |      |      |      |      |      |      |         |      |
| CP                         | 30  | 0.13 | 0.2  | 0.3  | 0.07 | 0.07 | 0.0  | 0.6  | 0.0     | 0.2  |
| CunI                       | 40  | 0.95 | 0.95 | 0.25 | 0.8  | 0.28 | 0.45 | 0.0  | 0.05    | 0.0  |
| T5 <sub>ft</sub>           | 30  | 0.27 | 0.33 | 0.03 | 0.0  | 0.23 | 0.03 | 0.43 | 0.0     | 0.23 |
| Interno                    | 40  | 0.57 | 0.6  | 0.32 | 0.72 | 0.22 | 0.1  | 0.15 | 0.2     | 0.0  |
| mT0 <sub>ft</sub>          | 40  | 0.85 | 0.85 | 0.48 | 0.78 | 0.2  | 0.2  | 0.0  | 0.15    | 0.0  |
| mT5 <sub>base,ft</sub>     | 70  | 0.51 | 0.51 | 0.34 | 0.44 | 0.23 | 0.2  | 0.01 | 0.47    | 0.0  |
| mT5 <sub>base,ft</sub> ru  | 40  | 0.72 | 0.72 | 0.42 | 0.68 | 0.32 | 0.32 | 0.0  | 0.28    | 0.0  |
| mT5 <sub>base,ft</sub> en  | 30  | 0.23 | 0.23 | 0.23 | 0.13 | 0.1  | 0.03 | 0.03 | 0.73    | 0.0  |
| mT5 <sub>large,ft</sub>    | 70  | 0.5  | 0.49 | 0.3  | 0.31 | 0.13 | 0.21 | 0.01 | 0.49    | 0.0  |
| mT5 <sub>large,ft</sub> ru | 40  | 0.5  | 0.5  | 0.32 | 0.35 | 0.12 | 0.38 | 0.0  | 0.5     | 0.0  |
| mT5 <sub>large,ft</sub> en | 30  | 0.5  | 0.47 | 0.27 | 0.27 | 0.13 | 0.0  | 0.03 | 0.47    | 0.0  |
| Results for each dataset   |     |      |      |      |      |      |      |      |         |      |
| KELM-E en                  | 20  | 0.1  | 0.1  | 0.1  | 0.05 | 0.1  | 0.0  | 0.05 | 0.4     | 0.45 |
| KELM-E ru                  | 25  | 0.52 | 0.56 | 0.16 | 0.56 | 0.2  | 0.2  | 0.0  | 0.44    | 0.0  |
| KELM-E+P en                | 100 | 0.32 | 0.35 | 0.23 | 0.13 | 0.14 | 0.02 | 0.32 | 0.28    | 0.04 |
| KELM-E+P en (0.5, 0.6)     | 20  | 0.35 | 0.35 | 0.25 | 0.15 | 0.25 | 0.0  | 0.45 | 0.1     | 0.1  |
| KELM-E+P en (0.6, 0.7)     | 20  | 0.35 | 0.4  | 0.15 | 0.2  | 0.0  | 0.1  | 0.35 | 0.2     | 0.0  |
| KELM-E+P en (0.7, 0.8)     | 20  | 0.5  | 0.5  | 0.35 | 0.15 | 0.25 | 0.0  | 0.2  | 0.25    | 0.05 |
| KELM-E+P en (0.8, 0.9)     | 20  | 0.25 | 0.35 | 0.3  | 0.1  | 0.15 | 0.0  | 0.2  | 0.4     | 0.05 |
| KELM-E+P en (0.9, 1.0)     | 20  | 0.15 | 0.15 | 0.1  | 0.05 | 0.05 | 0.0  | 0.4  | 0.45    | 0.0  |
| KELM-E+P ru                | 125 | 0.69 | 0.68 | 0.38 | 0.62 | 0.25 | 0.33 | 0.02 | 0.28    | 0.0  |
| KELM-E+P ru (0.5, 0.6)     | 25  | 0.88 | 0.84 | 0.12 | 0.88 | 0.4  | 0.28 | 0.04 | 0.08    | 0.0  |
| KELM-E+P ru (0.6, 0.7)     | 25  | 0.8  | 0.8  | 0.44 | 0.76 | 0.4  | 0.36 | 0.04 | 0.12    | 0.0  |
| KELM-E+P ru (0.7, 0.8)     | 25  | 0.64 | 0.64 | 0.48 | 0.56 | 0.24 | 0.36 | 0.0  | 0.36    | 0.0  |
| KELM-E+P ru (0.8, 0.9)     | 25  | 0.52 | 0.52 | 0.4  | 0.48 | 0.08 | 0.2  | 0.04 | 0.44    | 0.0  |
| KELM-E+P ru (0.9, 1.0)     | 25  | 0.6  | 0.6  | 0.44 | 0.44 | 0.12 | 0.44 | 0.0  | 0.4     | 0.0  |
| ru-WebNLG C                | 25  | 0.88 | 0.92 | 0.76 | 0.64 | 0.04 | 0.36 | 0.04 | 0.04    | 0.0  |
| ru-WebNLG E                | 25  | 0.92 | 0.92 | 0.08 | 1.0  | 0.36 | 0.12 | 0.08 | 0.0     | 0.0  |
| Results for each language  |     |      |      |      |      |      |      |      |         |      |
| English                    | 120 | 0.28 | 0.31 | 0.21 | 0.12 | 0.13 | 0.02 | 0.28 | 0.3     | 0.11 |
| Russian                    | 200 | 0.72 | 0.72 | 0.36 | 0.66 | 0.23 | 0.29 | 0.03 | 0.24    | 0.0  |

Table 11: Full results of qualitative analysis. A: addition, O: omission, R: repetition, ED: entity distortion, PU: property understanding error, TC: topic change, CT: complex text. Ratio – yes / (# of instances in the category). The # column – number of instances to annotate in the category
